# Supplementary material for: Using a process-based dendroclimatic proxy system model in a data assimilation framework: a test case in the Southern Hemisphere over the past centuries
Source: Copernicus journal article supplement (doi:10.5194/cp-2021-189), 2022-01-18
Supplement: Supplementary file 1 [file cp-2021-189-supplement.pdf]

## S1: Supplementary materials

**Table S1.** Pearson correlation coefficient between the observed tree-ring width (TRW) time series and the tree-ring index time series simulated by the regression model (Sect. 2.4.2) over 1950-2000 (calibration period) and 1901-1949 (verification period) at the 21 TRW sites of the PAGES2k databases (PAGES 2k Consortium, 2013, 2017). The site names are from the PAGES2k database: *Aus* for Tasmanian or New Zealand sites; *SAm* for South American sites. Asterisks stand for significant correlation coefficients at the 95% confidence level.

| Site    | Calibration | Verification |
|---------|-------------|--------------|
| Aus_001 | 0.42*       | -0.09        |
| Aus_002 | 0.31*       | -0.08        |
| Aus_004 | 0.24        | 0.15         |
| Aus_005 | 0.52*       | -0.03        |
| Aus_007 | 0.65*       | 0.35*        |
| Aus_009 | 0.43*       | -0.06        |
| Aus_030 | 0.16        | 0.31*        |
| Aus_031 | 0.25        | -0.05        |
| SAm_006 | 0.65        | 0.01         |
| SAm_024 | 0.09        | 0.03         |
| SAm_025 | 0.30*       | 0.50*        |
| SAm_029 | 0.25        | 0.12         |
| SAm_9   | 0.29*       | -0.06        |
| SAm_10  | 0.17        | 0.07         |
| SAm_11  | 0.57*       | 0.22         |
| SAm_12  | 0.31*       | 0.09         |
| SAm_15  | 0.18        | -0.04        |
| SAm_16  | 0.18        | 0.21         |
| SAm_17  | 0.20        | 0.22         |
| SAm_18  | 0.09        | -0.07        |
| SAm_19  | 0.13        | -0.15        |

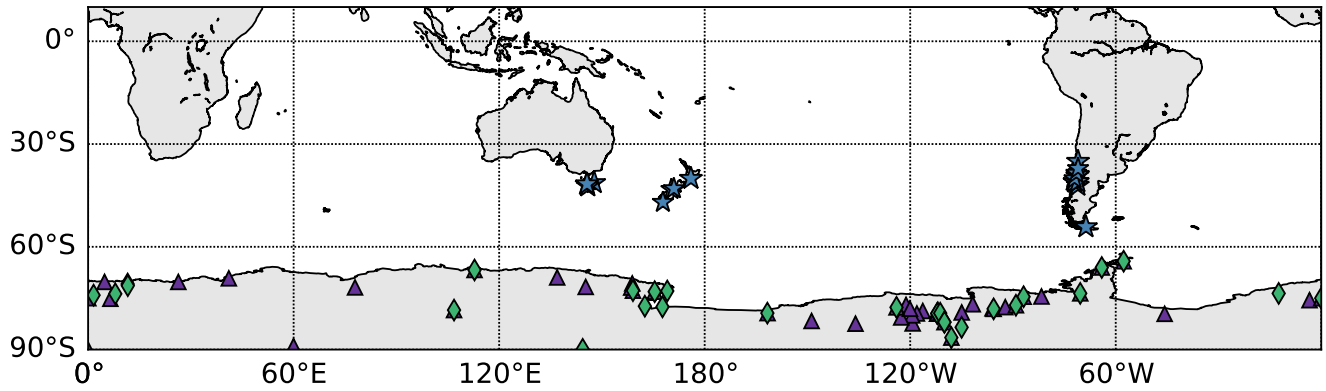

**Figure S1.** Location of the 21 tree-ring width (TRW) records (blue stars) from the PAGES2k databases (PAGES 2k Consortium, 2013, 2017); the 49 ice core snow accumulation records (purple triangles) from Thomas et al. (2017) and Medley et al. (2018); and the 29  $\delta^{18}O$  records (green diamonds) from Stenni et al. (2017) (Sect. 2.3). Background map from Hunter (2007).

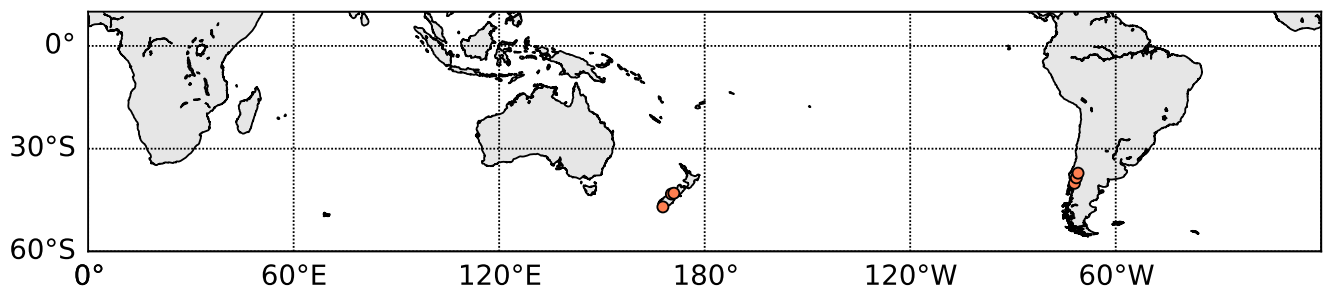

**Figure S2.** Location of the six tree-ring width (TRW) records (orange circles) from the PAGES2k databases (PAGES 2k Consortium, 2013, 2017) assimilated with the MAIDEN model calibrated over the 1950-2000 CE time period (see Sect. 2.4.1 for more details). Background map from Hunter (2007).

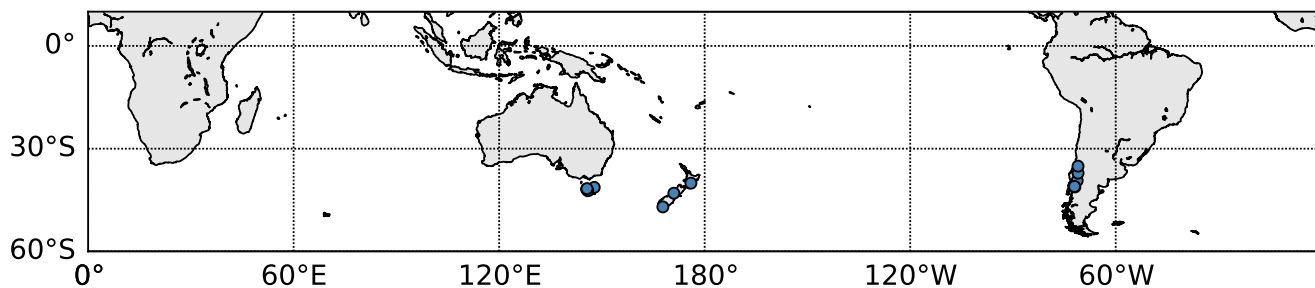

**Figure S3.** Location of the 12 tree-ring width (TRW) records (blue circles) from the PAGES2k databases (PAGES 2k Consortium, 2013, 2017) assimilated with the regression-based model calibrated over the 1901-2000 CE time period (see Sect. 2.4.2 for more details). Background map from Hunter (2007).

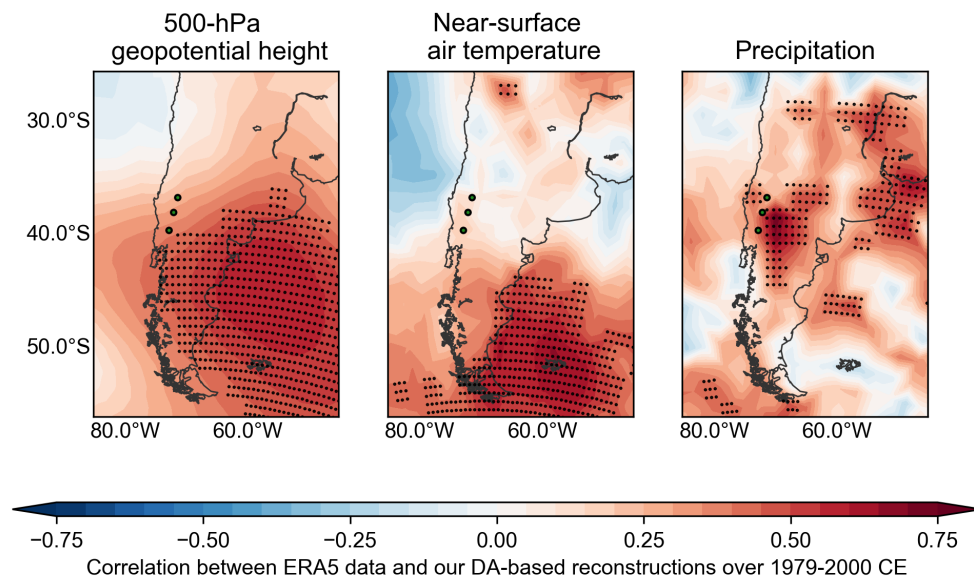

**Figure S4.** Pearson correlation coefficient between the reconstructed and ERA5 geopotential height at 500 hPa, near-surface air temperature or cumulative precipitation in South America over 1979-2000 CE for the TIC-MDN experiment (see Sect. 3 and Table 1 for details on the experiment). The green dots indicate the localization of the assimilated tree-ring width records. The black dots indicate a significant correlation coefficient at the 95% confidence level.

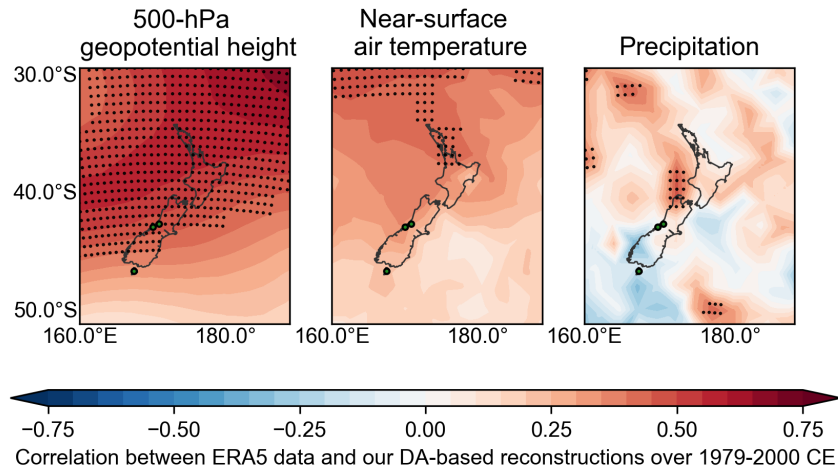

**Figure S5.** Pearson correlation coefficient between the reconstructed and ERA5 geopotential height at 500 hPa, near-surface air temperature or cumulative precipitation in New Zealand over 1979-2000 CE for the TIC-MDN experiment (see Sect. 3 and Table 1 for details on the experiment). The green dots indicate the localization of the assimilated tree-ring width records. The black dots indicate a significant correlation coefficient at the 95% confidence level.

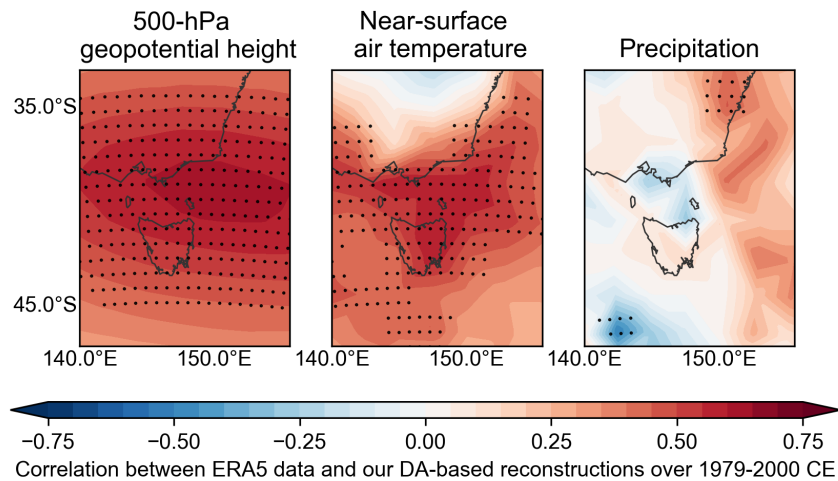

**Figure S6.** Pearson correlation coefficient between the reconstructed and ERA5 geopotential height at 500 hPa, near-surface air temperature or cumulative precipitation in Tasmania over 1979-2000 CE for the TIC-MDN experiment (see Sect. 3 and Table 1 for details on the experiment). The green dots indicate the localization of the assimilated tree-ring width records. The black dots indicate a significant correlation coefficient at the 95% confidence level.

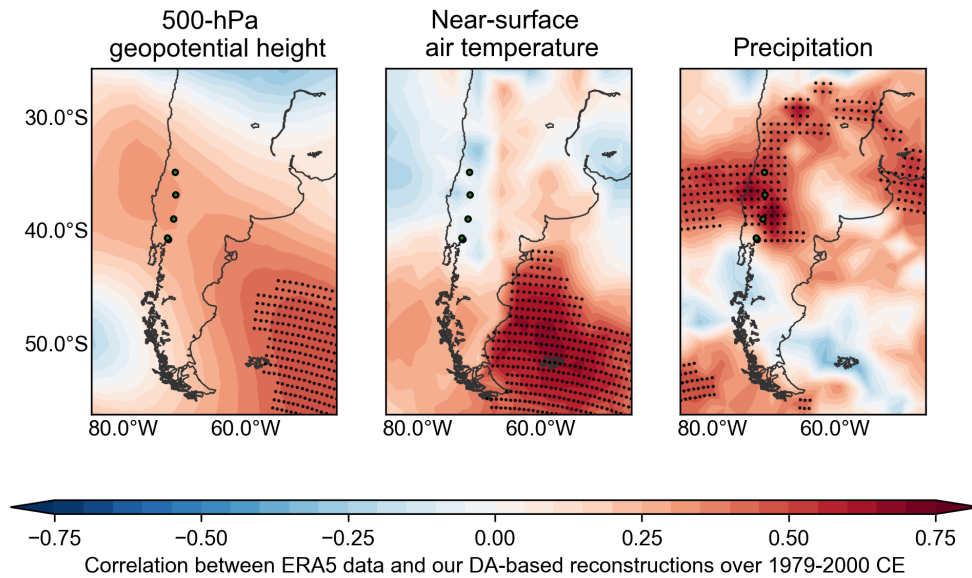

**Figure S7.** Pearson correlation coefficient between the reconstructed and ERA5 geopotential height at 500 hPa, near-surface air temperature or cumulative precipitation in South America over 1979-2000 CE for the TIC-reg experiment (see Sect. 3 and Table 1 for details on the experiment). The green dots indicate the localization of the assimilated tree-ring width records. The black dots indicate a significant correlation coefficient at the 95% confidence level.

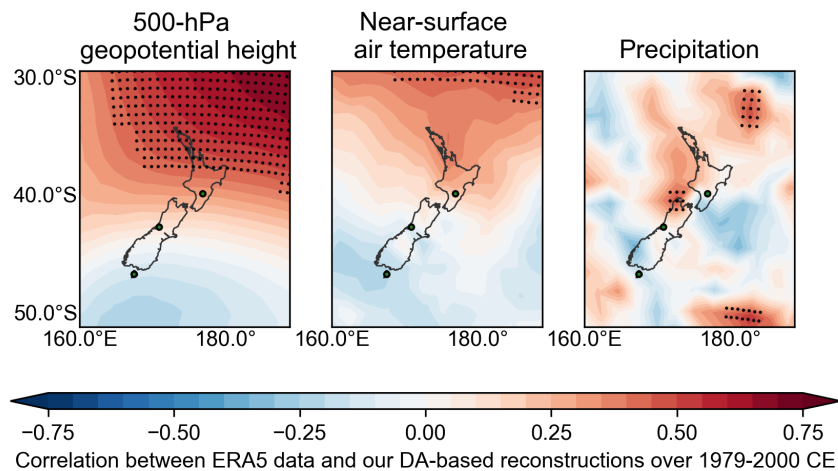

**Figure S8.** Pearson correlation coefficient between the reconstructed and ERA5 geopotential height at 500 hPa, near-surface air temperature or cumulative precipitation in New Zealand over 1979-2000 CE for the TIC-reg experiment (see Sect. 3 and Table 1 for details on the experiment). The green dots indicate the localization of the assimilated tree-ring width records. The black dots indicate a significant correlation coefficient at the 95% confidence level.

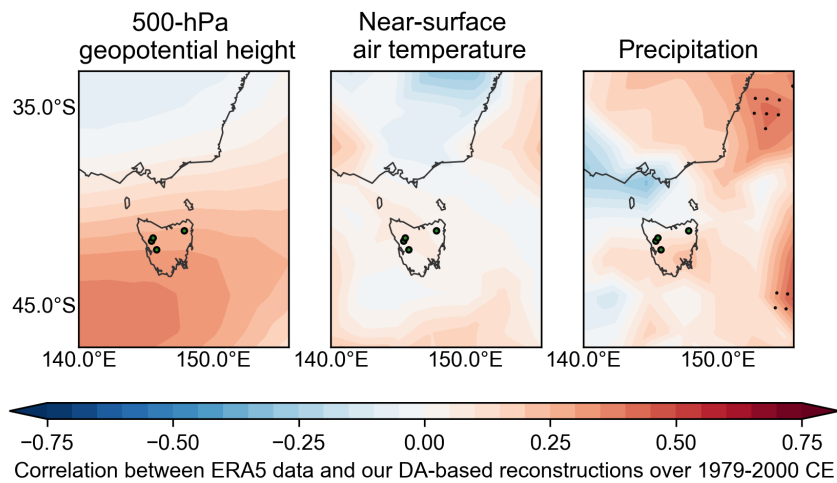

**Figure S9.** Pearson correlation coefficient between the reconstructed and ERA5 geopotential height at 500 hPa, near-surface air temperature or cumulative precipitation in Tasmania over 1979-2000 CE for the TIC-reg experiment (see Sect. 3 and Table 1 for details on the experiment). The green dots indicate the localization of the assimilated tree-ring width records. The black dots indicate a significant correlation coefficient at the 95% confidence level.

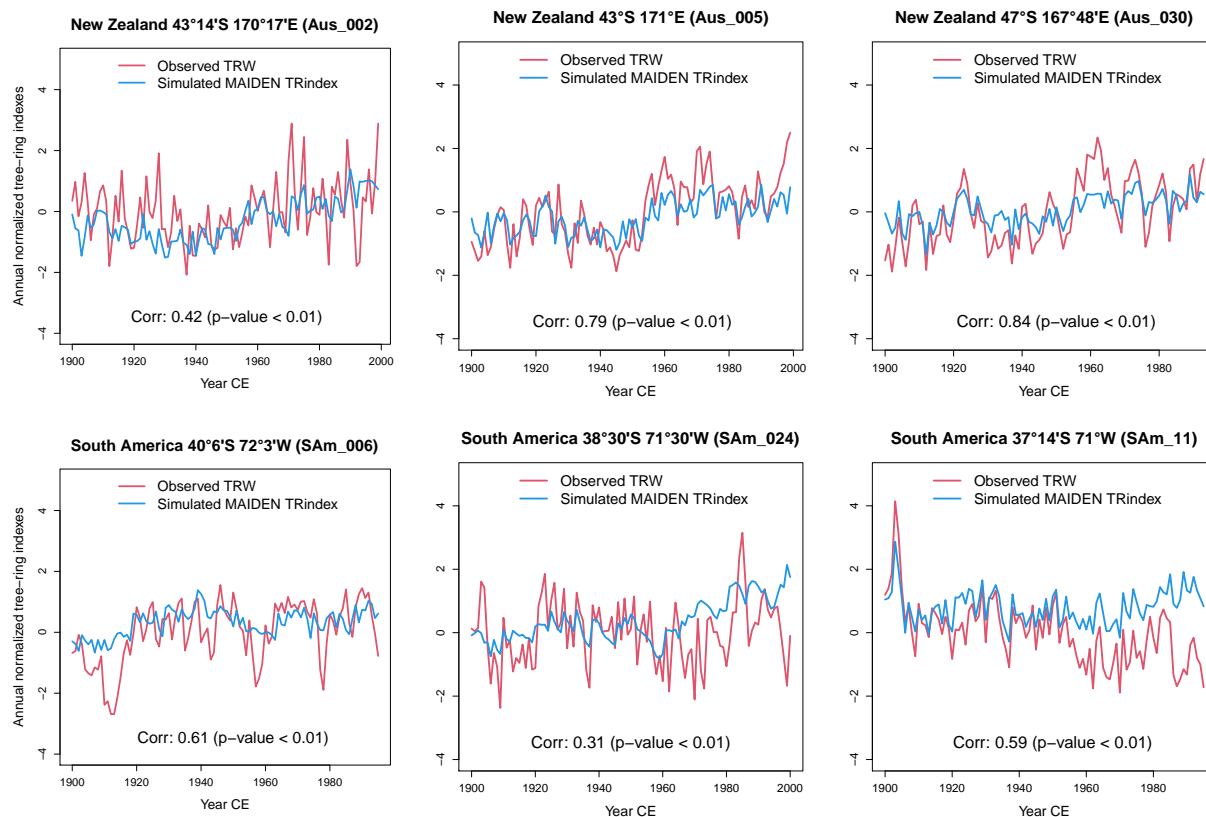

**Figure S10.** Observed tree-ring width and simulated tree-ring index by MAIDEN over 1900-2000 CE at the six assimilated tree-ring width sites (Sect. 2.4.1). Pearson correlation coefficient (Corr) between observed and simulated tree-ring index and associated p-value. The observations are normalized relative to 1900-2000 CE. The simulations are normalized relative to 1900-2000 CE using the mean and the standard deviation of the reference run of MAIDEN with the iCESM1 data used in the data assimilation procedure (Sect. 2.4.1). The TIC-MDN reanalysis is used to run MAIDEN (see Sect. 3 for details on the data assimilation experiment).

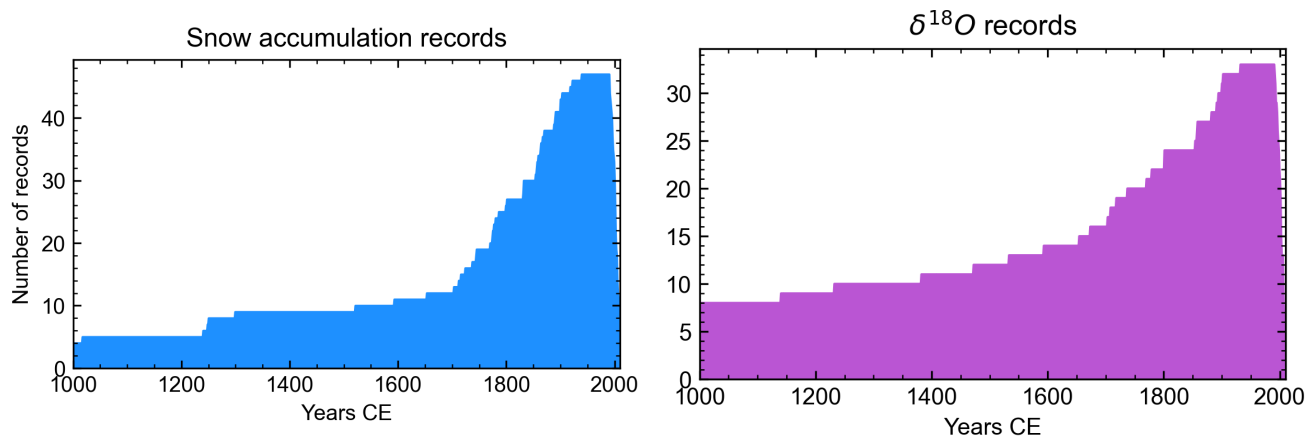

**Figure S11.** Number of snow accumulation and  $\delta^{18}\text{O}$  records used in this study (Sect. 2.3.2) over 1000-2000 CE. Figures from Dalaiden et al. (2021).



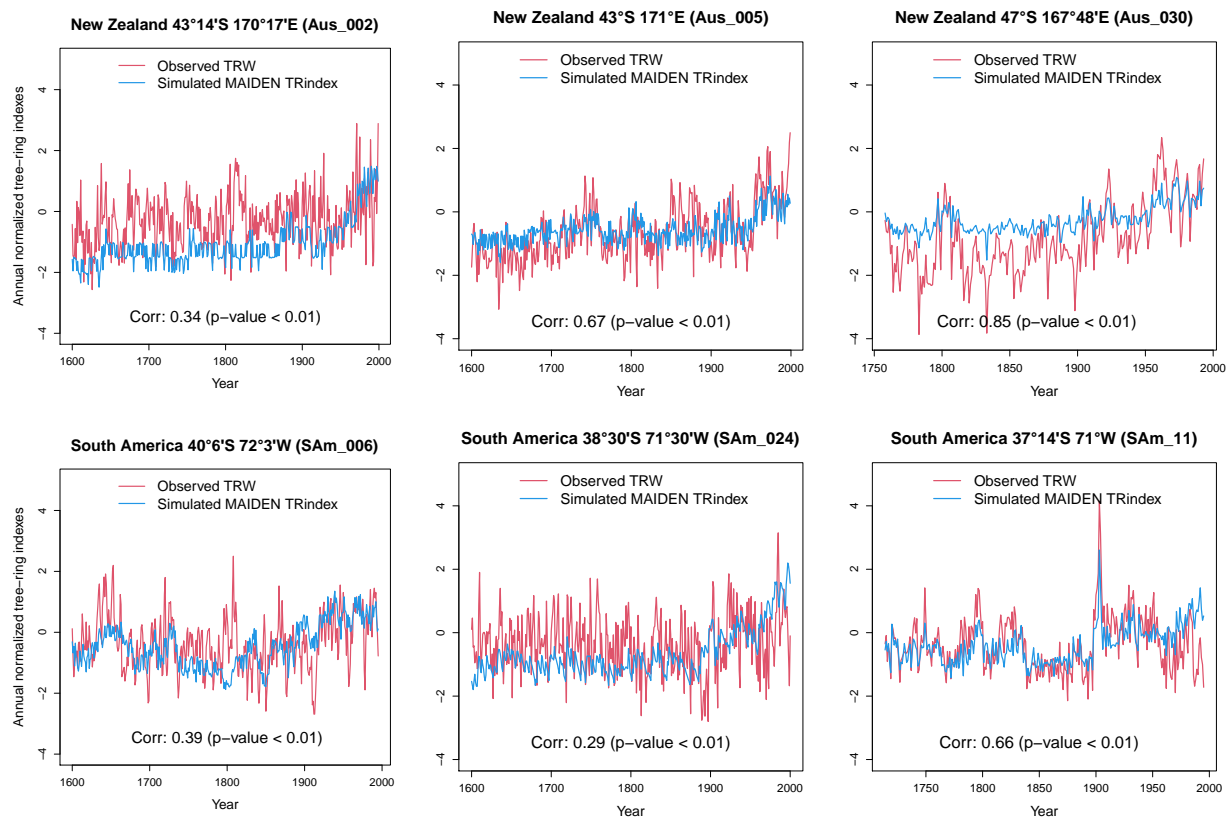

**Figure S12.** Observed tree-ring width and simulated tree-ring index by MAIDEN over 1600-2000 CE at the six assimilated tree-ring width sites (Sect. 2.4.1). Pearson correlation coefficient (Corr) between observed and simulated tree-ring index and associated p-value. The observations are normalized relative to 1900-2000 CE. The simulations are normalized relative to 1900-2000 CE using the mean and the standard deviation of the reference run of MAIDEN with the iCESM1 data used in the data assimilation procedure (Sect. 2.4.1). The TIC-MDN reanalysis is used to run MAIDEN (see Sect. 3 for details on the data assimilation experiment).
